# Supplementary material
Source: PubMed Central journal article supplement (PMC4041514)
Supplement: NIHMS328071-supplement-01.pdf [file NIHMS328071-supplement-01.pdf]

# Perceived Built Environment and Physical Activity in U.S. Women by Sprawl and Region

Philip J. Troped, PhD, Kosuke Tamura, MS, Heather A. Whitcomb, MA, Francine Laden, ScD

## Appendix A

Perceptions of neighborhood environment among NHSII<sup>a</sup> participants by demographic, health, and environmental characteristics (N=68,968), % (n)

|                                   | Total         | Crime; unsafe to walk at night | Shops/stores in easy walking distance | Sidewalks on most streets | Free/low-cost recreation facilities |
|-----------------------------------|---------------|--------------------------------|---------------------------------------|---------------------------|-------------------------------------|
| <b>Overall sample</b>             | 100 (68,968)  | 6.2 (4247)                     | 26.6 (18,366)                         | 51.3 (35,369)             | 67.2 (46,337)                       |
| <b>Age (years)</b>                |               |                                |                                       |                           |                                     |
| 40–49                             | 41.9 (28,862) | 5.1 (1466)                     | 26.8 (7,726)                          | 50.9 (14,679)             | 68.0 (19,612)                       |
| 50–59                             | 58.2 (40,106) | 6.9 (2781)                     | 26.5 (10,640)                         | 51.6 (20,690)             | 66.6 (26,725)                       |
| <b>Race</b>                       |               |                                |                                       |                           |                                     |
| White                             | 96.0 (66,238) | 5.8 (3842)                     | 26.0 (17,186)                         | 50.3 (33,318)             | 66.9 (44,277)                       |
| Black                             | 1.5 (998)     | 19.1 (191)                     | 42.5 (424)                            | 72.3 (722)                | 72.2 (721)                          |
| Asian                             | 1.5 (1,012)   | 12.5 (126)                     | 45.4 (459)                            | 82.6 (836)                | 80.5 (815)                          |
| Other race                        | 0.9 (620)     | 12.3 (76)                      | 40.5 (251)                            | 68.6 (425)                | 71.5 (443)                          |
| Missing                           | 0.1 (100)     | 12.0 (12)                      | 46.0 (46)                             | 68.0 (68)                 | 81.0 (81)                           |
| <b>Ethnicity</b>                  |               |                                |                                       |                           |                                     |
| Hispanic                          | 1.7 (1,160)   | 9.9 (115)                      | 37.7 (437)                            | 66.0 (765)                | 72.9 (846)                          |
| Non-Hispanic                      | 97.8 (67,441) | 6.1 (4105)                     | 26.4 (17,829)                         | 51.0 (34,405)             | 67.1 (45,227)                       |
| Missing                           | 0.5 (367)     | 7.4 (27)                       | 27.3 (100)                            | 54.2 (199)                | 71.9 (264)                          |
| <b>Husband's education</b>        |               |                                |                                       |                           |                                     |
| Less than high school/high school | 14.1 (9,689)  | 6.2 (598)                      | 21.7 (2,104)                          | 42.7 (4,136)              | 59.2 (5,739)                        |
| 2-year college                    | 16.2 (11,193) | 6.2 (689)                      | 24.8 (2,779)                          | 47.4 (5,304)              | 63.3 (7,082)                        |
| 4-year college                    | 27.5 (18,946) | 5.4 (1016)                     | 26.1 (4,953)                          | 52.1 (9,862)              | 68.7 (13,009)                       |
| Graduate school                   | 27.3 (18,834) | 4.8 (903)                      | 28.0 (5,279)                          | 53.0 (9,979)              | 72.0 (13,562)                       |
| Missing                           | 14.9 (10,306) | 10.1 (1041)                    | 31.5 (3,251)                          | 59.1 (6,088)              | 67.4 (6,945)                        |
| <b>BMI categories</b>             |               |                                |                                       |                           |                                     |
| Underweight (<18.5)               | 5.6 (3,844)   | 6.7 (258)                      | 28.0 (1,077)                          | 52.0 (2,000)              | 68.6 (2,635)                        |
| Normal (18.5–24.9)                | 42.4 (29,266) | 4.8 (1404)                     | 28.3 (8,292)                          | 52.0 (15,217)             | 70.8 (20,727)                       |
| Overweight (25–29.9)              | 27.3 (18,832) | 6.2 (1167)                     | 26.9 (5,056)                          | 51.0 (9,603)              | 66.7 (12,569)                       |

|                                                           | Total         | Crime; unsafe to walk at night | Shops/stores in easy walking distance | Sidewalks on most streets | Free/low-cost recreation facilities |
|-----------------------------------------------------------|---------------|--------------------------------|---------------------------------------|---------------------------|-------------------------------------|
| Obese ( $\geq 30$ )                                       | 24.7 (17,026) | 8.3 (1418)                     | 23.2 (3941)                           | 50.2 (8549)               | 61.1 (10,406)                       |
| <b>Urban sprawl index</b>                                 |               |                                |                                       |                           |                                     |
| Low ( $\geq 111.30$ )                                     | 33.9 (23,343) | 8.6 (2015)                     | 38.9 (9089)                           | 71.2 (16,613)             | 78.6 (18,357)                       |
| Medium (100.00–111.29)                                    | 33.1 (22,856) | 5.5 (1255)                     | 23.8 (5448)                           | 48.4 (11,057)             | 67.8 (15,503)                       |
| High (62.55–99.99)                                        | 33.0 (22,769) | 4.3 (977)                      | 16.8 (3829)                           | 33.8 (7,699)              | 54.8 (12,477)                       |
| <b>Region</b>                                             |               |                                |                                       |                           |                                     |
| Midwest                                                   | 30.6 (21,093) | 4.9 (1040)                     | 21.3 (4497)                           | 51.4 (10,847)             | 65.7 (13,862)                       |
| Northeast                                                 | 33.5 (23,074) | 5.0 (1147)                     | 27.8 (6423)                           | 43.9 (10,125)             | 68.4 (15,776)                       |
| South                                                     | 18.6 (12,842) | 7.2 (922)                      | 19.9 (2549)                           | 45.0 (5,777)              | 56.3 (7,229)                        |
| West                                                      | 17.3 (11,959) | 9.5 (1138)                     | 41.0 (4897)                           | 72.1 (8,620)              | 79.2 (9,470)                        |
| <b>Walk <math>\geq 500</math> MET-min/wk</b>              |               |                                |                                       |                           |                                     |
| Yes                                                       | 24.4 (16,813) | 4.8 (798)                      | 32.3 (5,424)                          | 54.9 (9,231)              | 72.9 (12,255)                       |
| No                                                        | 75.6 (52,155) | 6.6 (3449)                     | 24.8 (12,942)                         | 50.1 (26,138)             | 65.4 (34,082)                       |
| <b>Walk-jog-run-bike <math>\geq 500</math> MET-min/wk</b> |               |                                |                                       |                           |                                     |
| Yes                                                       | 36.2 (24,972) | 5.0 (1244)                     | 31.4 (7,841)                          | 54.4 (13,580)             | 72.7 (18,158)                       |
| No                                                        | 63.8 (43,996) | 6.8 (3003)                     | 23.9 (10,525)                         | 49.5 (21,789)             | 64.1 (28,179)                       |

min/wk, minutes/week; NHSII, Nurses' Health Study II

## Appendix B

Associations between perceived neighborhood environment index and meeting physical activity recommendations, stratified by urban sprawl and region (N=68,968), OR (95% CI)

|                     | One positive perception vs none |                                   | Two positive perceptions vs none |                                   | Three positive perceptions vs none |                                   | Four positive perceptions vs none |                                   |
|---------------------|---------------------------------|-----------------------------------|----------------------------------|-----------------------------------|------------------------------------|-----------------------------------|-----------------------------------|-----------------------------------|
|                     | Walk ≥ 500 MET-min/wk           | Walk-jog-run-bike ≥500 MET-min/wk | Walk ≥500 MET-min/wk             | Walk-jog-run-bike ≥500 MET-min/wk | Walk ≥500 MET-min/wk               | Walk-jog-run-bike ≥500 MET-min/wk | Walk ≥500 MET-min/wk              | Walk-jog-run-bike ≥500 MET-min/wk |
| <b>Overall</b>      | 0.98 (0.79, 1.22)               | 1.08 (0.89, 1.31)                 | 1.15 (0.93, 1.42)                | 1.30 (1.07, 1.58)                 | 1.30 (1.05, 1.61)                  | 1.47 (1.21, 1.78)                 | 1.73 (1.39, 2.15)                 | 1.95 (1.61, 2.37)                 |
| <b>Urban sprawl</b> |                                 |                                   |                                  |                                   |                                    |                                   |                                   |                                   |
| Low                 | 0.78 (0.50, 1.23)               | 0.85 (0.57, 1.28)                 | 0.84 (0.54, 1.32)                | 0.94 (0.63, 1.41)                 | 1.02 (0.65, 1.58)                  | 1.12 (0.75, 1.67)                 | 1.33 (0.85, 2.08)                 | 1.47 (0.98, 2.19)                 |
| Medium              | 0.88 (0.61, 1.27)               | 1.00 (0.72, 1.40)                 | 1.05 (0.73, 1.51)                | 1.21 (0.87, 1.69)                 | 1.12 (0.78, 1.62)                  | 1.31 (0.94, 1.82)                 | 1.54 (1.06, 2.22)                 | 1.77 (1.27, 2.48)                 |
| High                | 1.20 (0.86, 1.68)               | 1.28 (0.95, 1.71)                 | 1.46 (1.04, 2.04)                | 1.62 (1.21, 2.17)                 | 1.67 (1.19, 2.34)                  | 1.82 (1.36, 2.45)                 | 2.20 (1.56, 3.09)                 | 2.41 (1.78, 3.26)                 |
| <b>Region</b>       |                                 |                                   |                                  |                                   |                                    |                                   |                                   |                                   |
| Midwest             | 0.83 (0.55, 1.25)               | 0.96 (0.67, 1.39)                 | 0.99 (0.66, 1.49)                | 1.11 (0.77, 1.59)                 | 1.23 (0.82, 1.84)                  | 1.33 (0.92, 1.91)                 | 1.57 (1.04, 2.36)                 | 1.72 (1.19, 2.49)                 |
| Northeast           | 0.83 (0.55, 1.26)               | 0.91 (0.62, 1.34)                 | 0.95 (0.62, 1.43)                | 1.10 (0.75, 1.61)                 | 0.97 (0.64, 1.48)                  | 1.14 (0.78, 1.67)                 | 1.34 (0.88, 2.04)                 | 1.43 (0.98, 2.11)                 |
| South               | 1.17 (0.80, 1.72)               | 1.15 (0.83, 1.60)                 | 1.38 (0.94, 2.03)                | 1.41 (1.01, 1.95)                 | 1.60 (1.09, 2.34)                  | 1.60 (1.15, 2.23)                 | 2.02 (1.36, 3.00)                 | 2.17 (1.54, 3.05)                 |
| West                | 1.14 (0.61, 2.13)               | 1.50 (0.84, 2.69)                 | 1.24 (0.67, 2.29)                | 1.83 (1.03, 3.25)                 | 1.36 (0.73, 2.51)                  | 1.99 (1.12, 3.53)                 | 1.88 (1.01, 3.47)                 | 2.79 (1.57, 4.96)                 |

Note: Models adjusted for age, race, ethnicity, BMI categories, and husband's education. Perceived environment index is the sum of the number of positive perceptions from among four items (scores ranged from 0 to 4); cut-points for urban sprawl tertiles: low ≥111.30; medium = 100.00–111.29; high = 62.55–99.99 min/wk, minutes/week
